# Supplementary material
Source: PubMed Central journal article supplement (PMC2950185)
Supplement: 090976_1.pdf [file 090976_1.pdf]

**Appendix 1 (as supplied by author):** Search strategy used on Medline: (performed June week 2 2009)

- 1) Ethics Committees, Research/
- 2) Ethics Committees/
- 3) "Ethical Review"/
- 4) (research\$ adj3 ethic\$ adj3 review\$). tw.
- 5) irb.tw.
- 6) institutional review board\$.tw.
- 7) (research\$ adj3 ethic\$ adj3 committee\$). tw.
- 8) rec.tw.
- 9) reb.tw.
- 10) 1 or 2 or 3 or 4 or 5 or 6 or 7 or 8 or 9
- 11) disasters/ or disaster planning/ or mass casualty incidents/
- 12) Disease outbreaks/
- 13) exp Terrorism/
- 14) public emergenc\$.tw.
- 15) 11 or 12 or 13 or 14
- 16) 10 and 15

Search strategy used on Embase: (performed week 29 2009)

- 1) research ethics/
- 2) (research\$ adj3 ethic\$ adj3 review\$). tw.
- 3) (research\$ adj3 ethic\$ adj3 committee\$). tw.
- 4) irb.tw.
- 5) rec.tw.
- 6) reb.tw.
- 7) 1 or 2 or 3 or 4 or 5 or 6
- 8) disaster/
- 9) Pandemic/
- 10) terrorism/
- 11) public emergenc\$.tw.
- 12) 8 or 9 or 10 or 11
- 13) 7 and 12

Searches performed on World Cat and Google Scholar:

kw: research ethics, IRB kw: public emergencies  
kw: IRB, research ethics kw: public emergency  
kw: IRB, research ethics kw: disaster  
kw: research ethics, IRB, kw: pandemic  
kw: research ethics, IRB, kw: terrorism  
kw: research ethics, IRB, kw: disease outbreaks  
+ similar searches using REB, or REC instead of IRB
